# Supplementary material for: Photoinduced structural changes of cationic azo dyes confined in a two dimensional nanospace by two different mechanisms
Source: Royal Society of Chemistry journal article supplement (doi:10.1039/c6ra27749g), 2017-01-01
Supplement: c6ra27749g1.pdf [file c6ra27749g1.pdf]

*Electronic Supplementary Information*

**Photoinduced structural changes of cationic azo dyes confined  
in two dimensional nanospace by two different mechanisms**

by

**Tomohiko Okada,<sup>a</sup> Nozomi Nozaki,<sup>b</sup> Jangwon Seo,<sup>c</sup> Ji Eon Kwon,<sup>c</sup> Soo Young  
Park,<sup>c</sup> Hideo Hashizume,<sup>d</sup> Takayoshi Sasaki,<sup>d</sup> and Makoto Ogawa<sup>b,e\*</sup>**

- a) Department of Chemistry and Materials Engineering, Shinshu University, 4-17-1 Wakasato, Nagano 380-8553, Japan.
- b) Department of Earth Sciences, Waseda University, 1-6-1 Nishiwaseda, Shinjuku, Tokyo 169-8050, Japan.
- c) Center for Supramolecular Optoelectronic Materials, Seoul National University, 1 Gwanak-ro, Gwanak-gu, Seoul 151-744, Korea
- d) National Institute for Materials Science (NIMS), 1-1 Namiki, Tsukuba, Ibaraki 305-0044, Japan.
- e) Institute of Energy Science and Engineering, Vidyasirimedhi Institute of Science and Technology (VISTEC), 555 Moo 1 Tumbol Payupnai, Amphoe Wangchan, Rayong, 21210, Thailand.

\* E-mail: makoto.ogawa@vistec.ac.th

## Characterization of AzNaph<sup>+</sup>

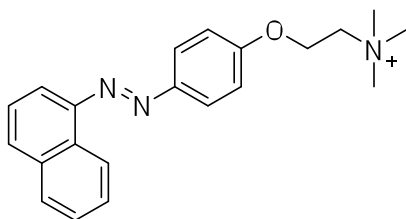

Chemical Formula: C<sub>21</sub>H<sub>24</sub>N<sub>3</sub>O<sup>+</sup>

Exact Mass: 334.19

Molecular Weight: 334.44

m/z: 334.19 (100.0%), 335.20 (23.0%), 336.20 (2.7%), 335.19 (1.1%)

ESI-MS: Thermo Finnigan / LCQ

<sup>1</sup>H NMR (300 MHz, DMSO) δ 8.86 (d, *J* = 8.2 Hz, 1H), 8.18 – 8.02 (m, 4H), 7.83 – 7.58 (m, 4H), 7.26 (d, *J* = 9.0 Hz, 2H), 4.63 (s, 2H), 3.94 – 3.81 (m, 2H), 3.23 (s, 9H).

Bruker / Avance-300

<sup>13</sup>C NMR (125 MHz, DMSO) δ 160.16, 147.35, 146.70, 133.93, 131.12, 130.39, 128.10, 127.15, 126.68, 125.85, 124.88, 122.81, 122.39, 115.48, 114.63, 111.56, 63.98, 62.12, 53.11.

Bruker / Avance-500

## Calculation of volume occupying azo dyes in the interlayer space

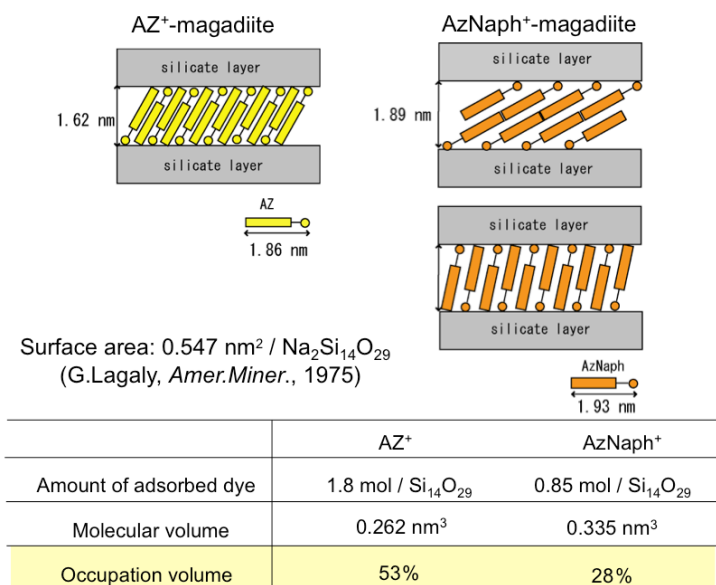

Occupation volume of the cationic azo dye in the interlayer space of magadiite (per Si<sub>14</sub>O<sub>29</sub> unit) was obtained by dividing the volume of intercalated azo dye (1) by the volume of the interlayer space (2).

(1) Volume of intercalated azo dye = (amount of the adsorbed cationic dye) × (the molecular volume [nm<sup>3</sup>])

- AZ<sup>+</sup>-magadiite:  $(1.8 / \text{Si}_{14}\text{O}_{29}) \times (0.262 \text{ nm}^3) = 0.472 \text{ nm}^3 / \text{Si}_{14}\text{O}_{29}$
- AzNaph<sup>+</sup>-magadiite:  $(0.85 / \text{Si}_{14}\text{O}_{29}) \times (0.335 \text{ nm}^3) = 0.285 \text{ nm}^3 / \text{Si}_{14}\text{O}_{29}$

(2) the volume of the interlayer space = (ideal surface area of magadiite 0.547 nm<sup>2</sup>/Na<sub>2</sub>Si<sub>14</sub>O<sub>29</sub>)<sup>\*1</sup> × (the gallery height [nm])

- AZ<sup>+</sup>-magadiite:  $(0.547 \text{ nm}^2 / \text{Na}_2\text{Si}_{14}\text{O}_{29}) \times (1.62 \text{ nm}) = 0.886 \text{ nm}^3 / \text{Si}_{14}\text{O}_{29}$
- AzNaph<sup>+</sup>-magadiite:  $(0.547 \text{ nm}^2 / \text{Na}_2\text{Si}_{14}\text{O}_{29}) \times (1.89 \text{ nm}) = 1.03 \text{ nm}^3 / \text{Si}_{14}\text{O}_{29}$

\*1: Lagaly, G.; Beneke, K. Weiss, A. *Am. Miner.* **1975**, *60*, 642.

**Occupation volume of azo dye in the interlayer space is**

- AZ<sup>+</sup>-magadiite:  $(0.472 / 0.886) \times 100 = \underline{\underline{53\%}}$
- AzNaph<sup>+</sup>-magadiite:  $(0.285 / 1.03) \times 100 = \underline{\underline{28\%}}$

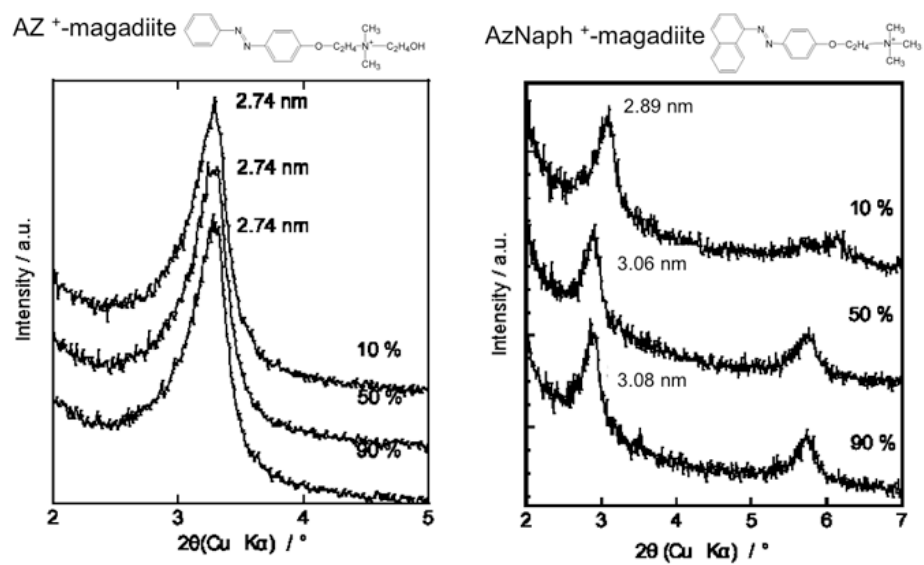

**Fig. S1.** XRD patterns of (a)  $trans\text{-AZ}^+$ - and (b)  $trans\text{-AzNaph}^+$ -magadiite recorded under different humidity of RH = 10, 50, and 90%.
